# Supplementary material for: YY1 lactylation in microglia promotes angiogenesis through transcription activation-mediated upregulation of FGF2
Source: PubMed Central journal article supplement (PMC10120156; doi:10.1186/s13059-023-02931-y), 2023-04-21

**Additional file 4. Uncropped western blot images.**

**Main Fig. 2c**

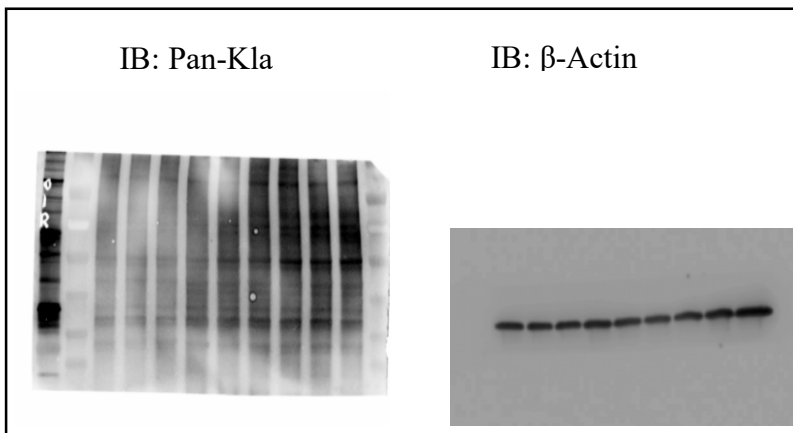

**Main Fig. 2e**

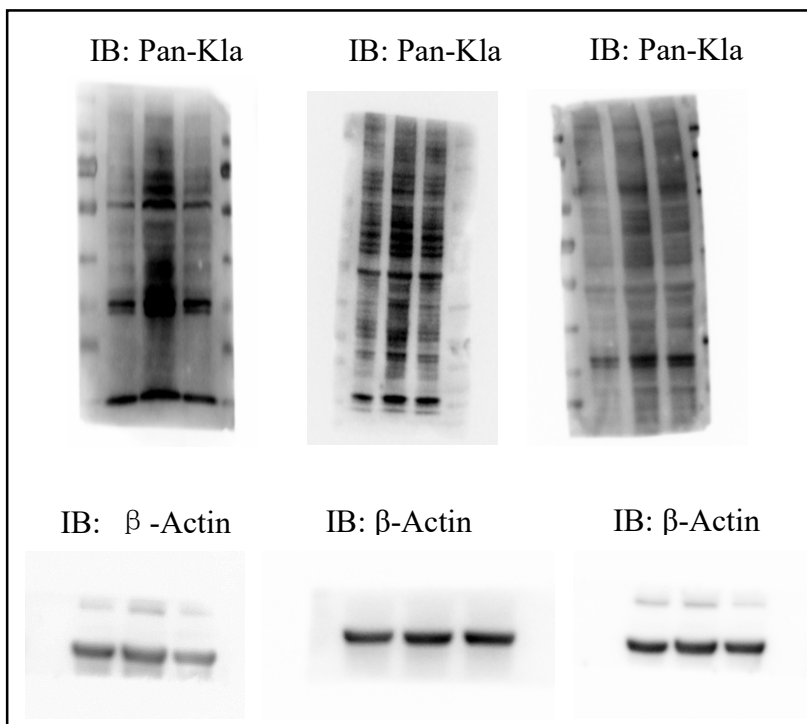

**Main Fig. 2g**

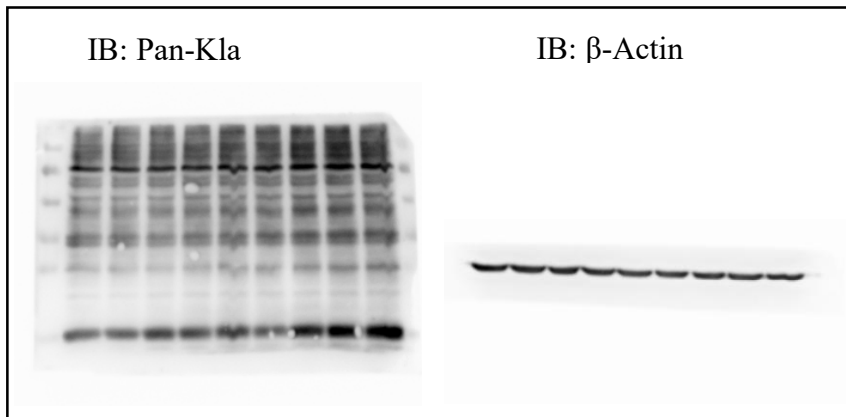

**Main Fig. 3b**

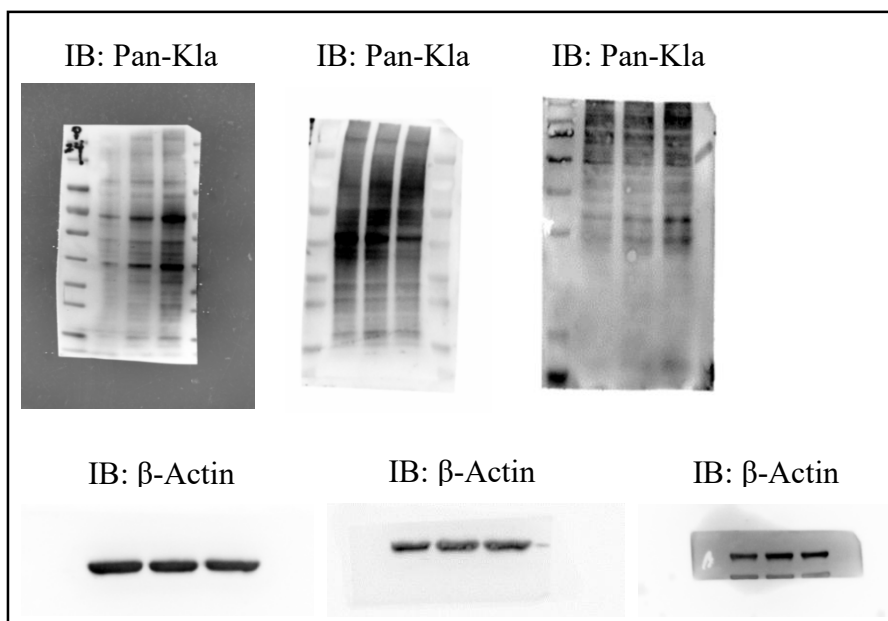

**Main Fig. 3h**

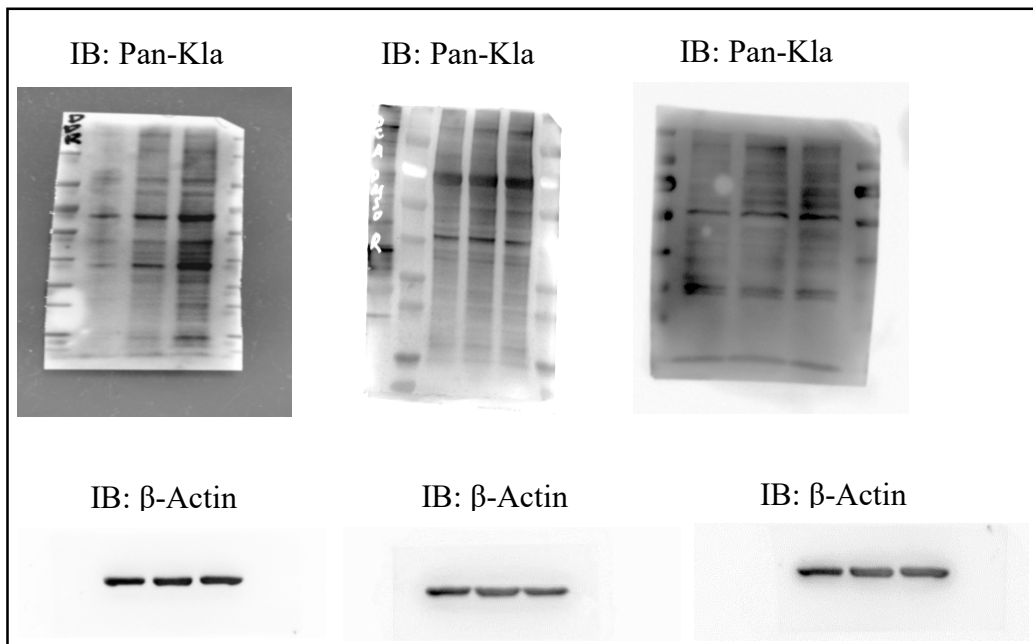

**Main Fig. 4e**

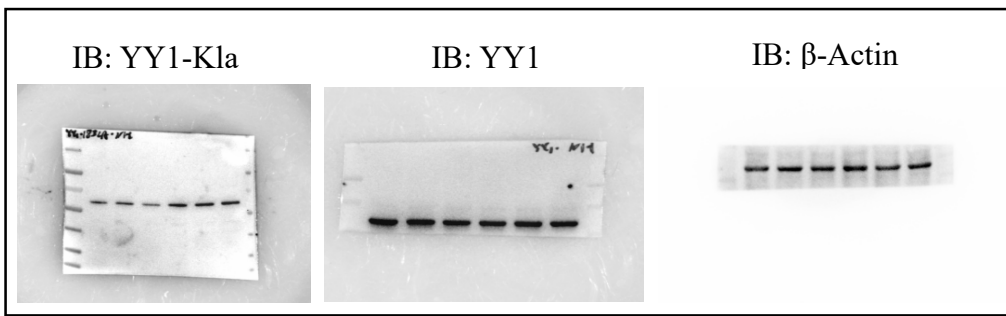

**Main Fig. 5c**

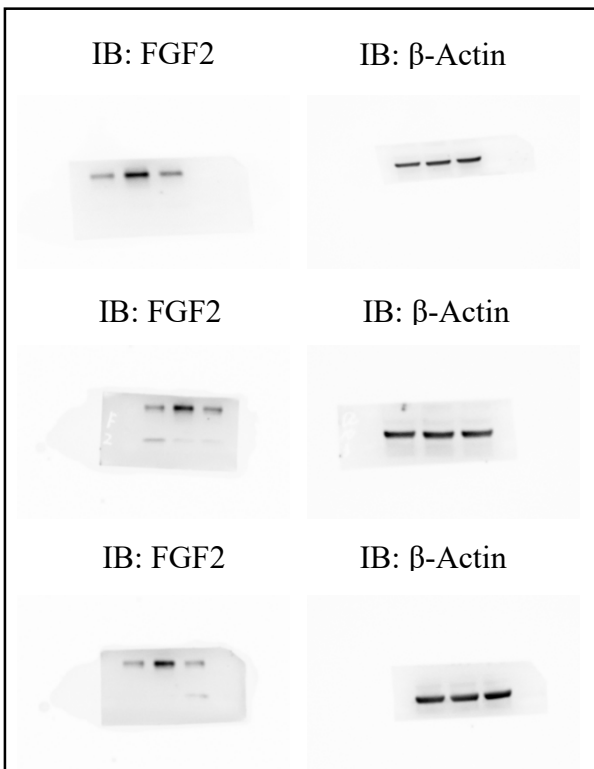

**Main Fig. 5d**

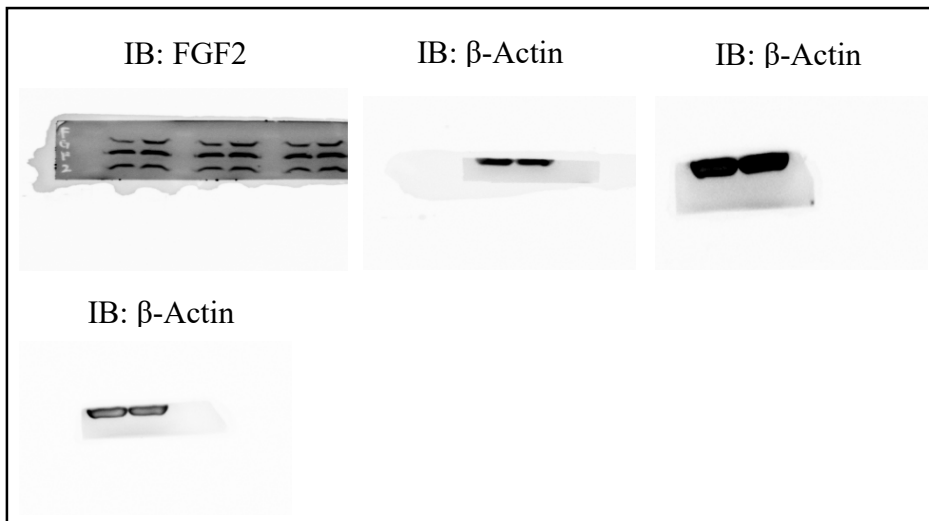

**Main Fig. 5f**

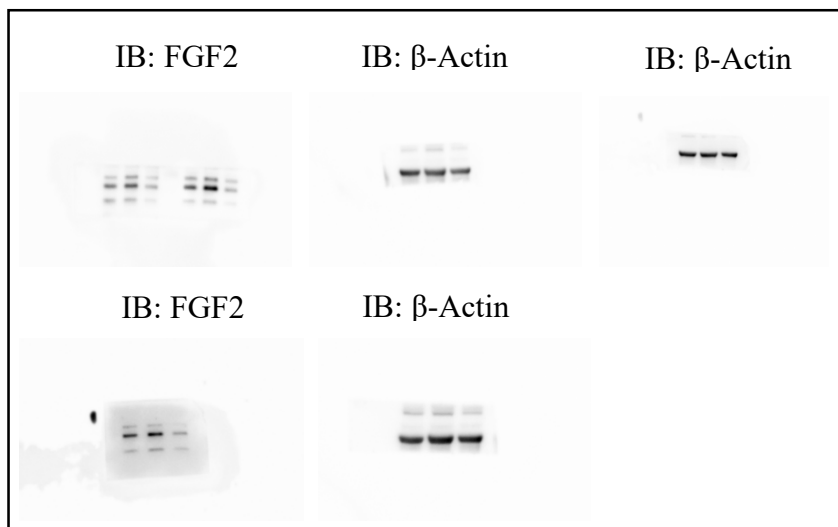

**Main Fig. 6a**

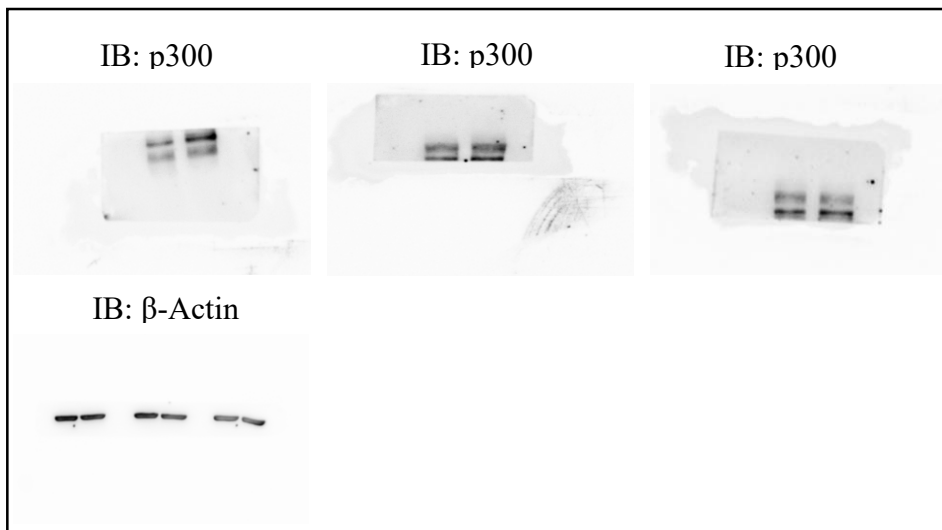

**Main Fig. 6b**

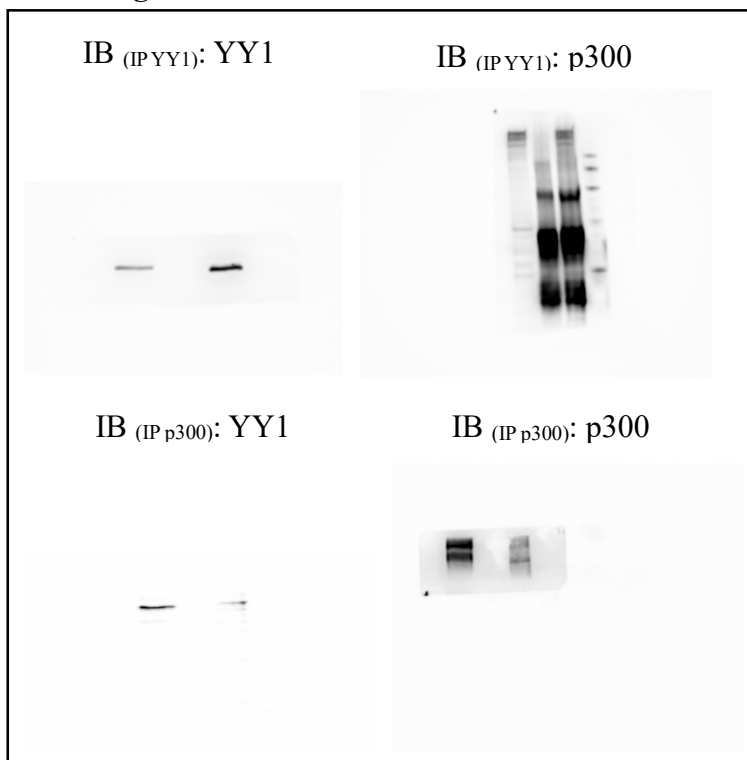

**Main Fig. 6d**

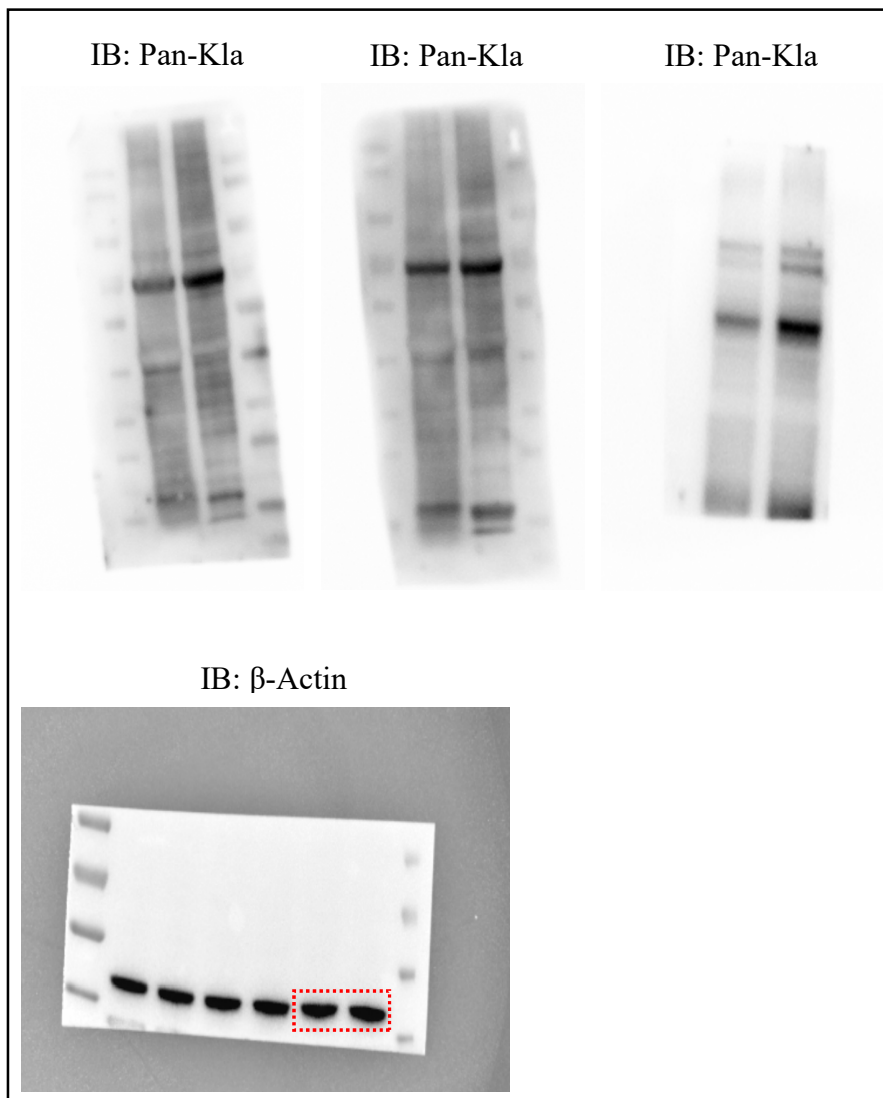

**Main Fig. 6e**

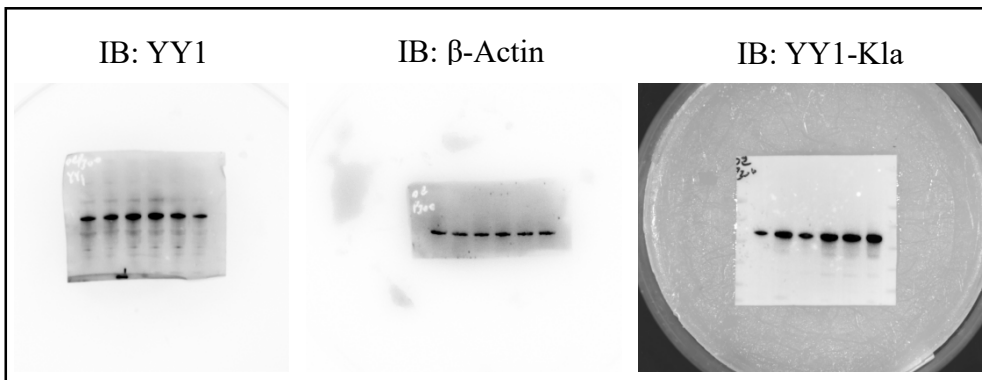

**Main Fig. 6f**

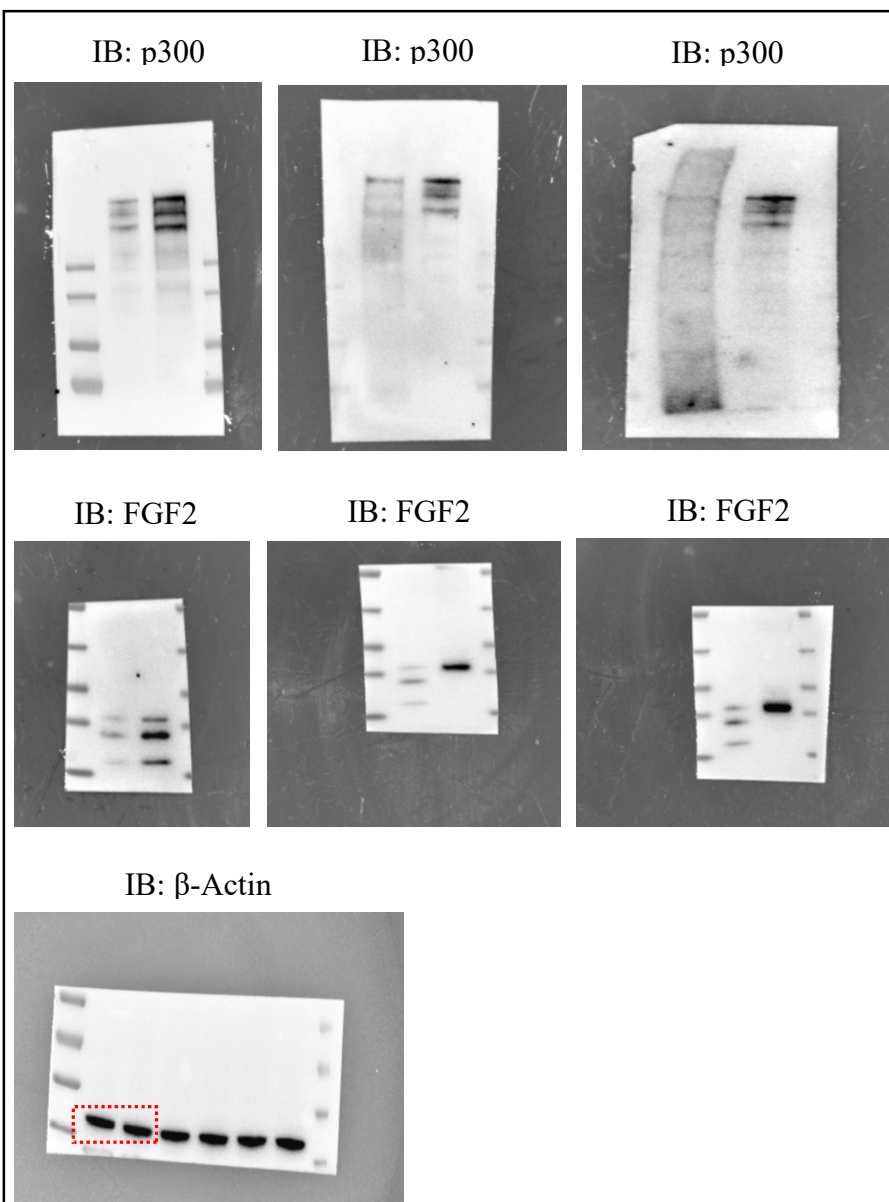



**Main Fig. 6g**

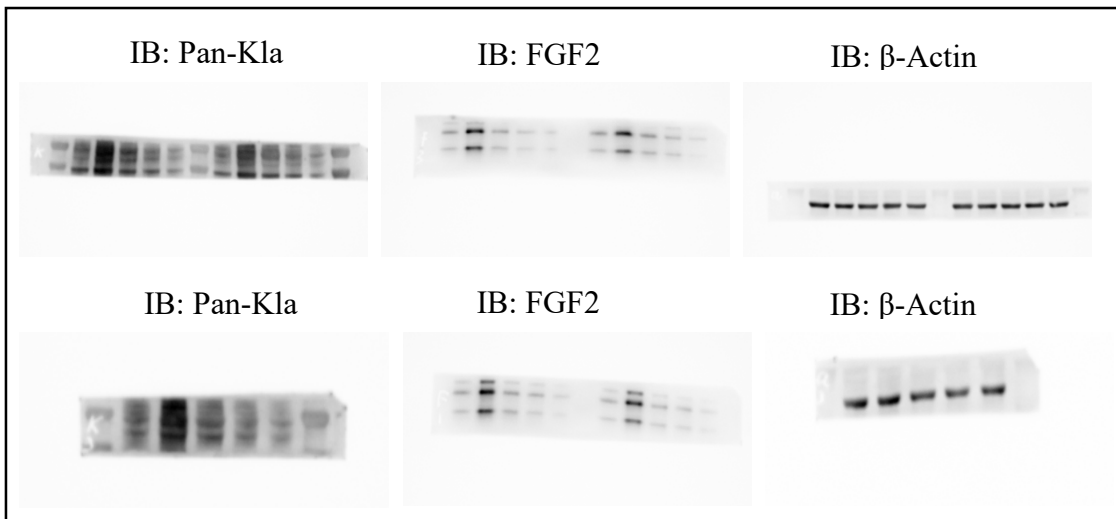

**Main Fig. 6h**

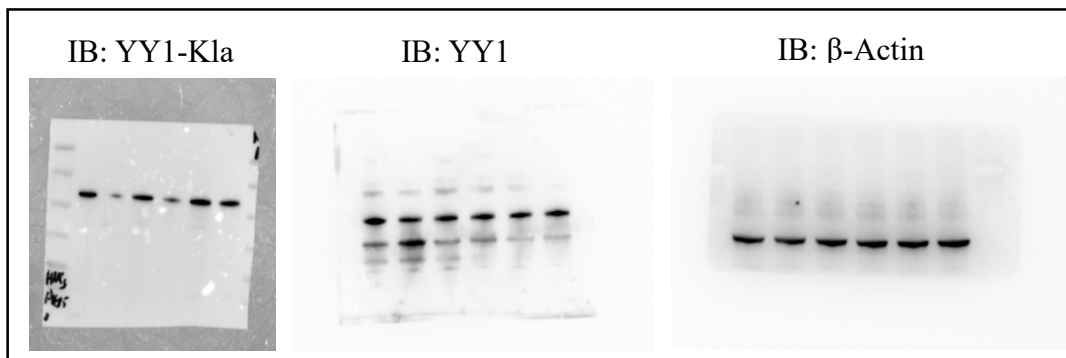

**Main Fig. 7a**

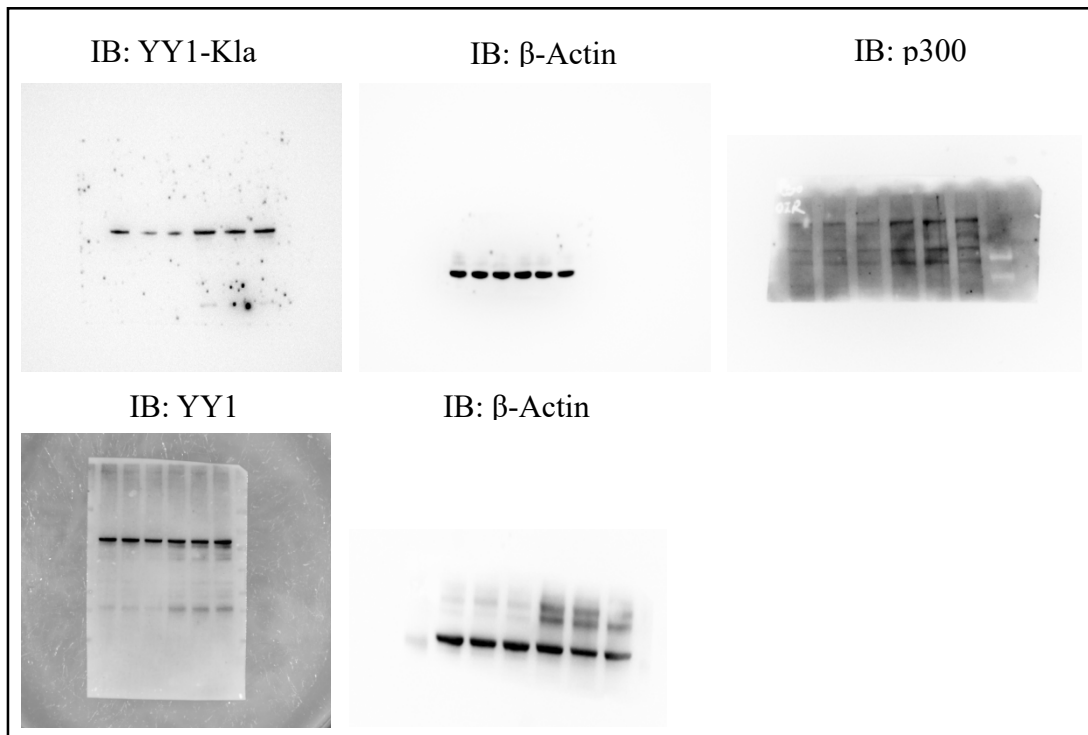

**Main Fig. 7c**

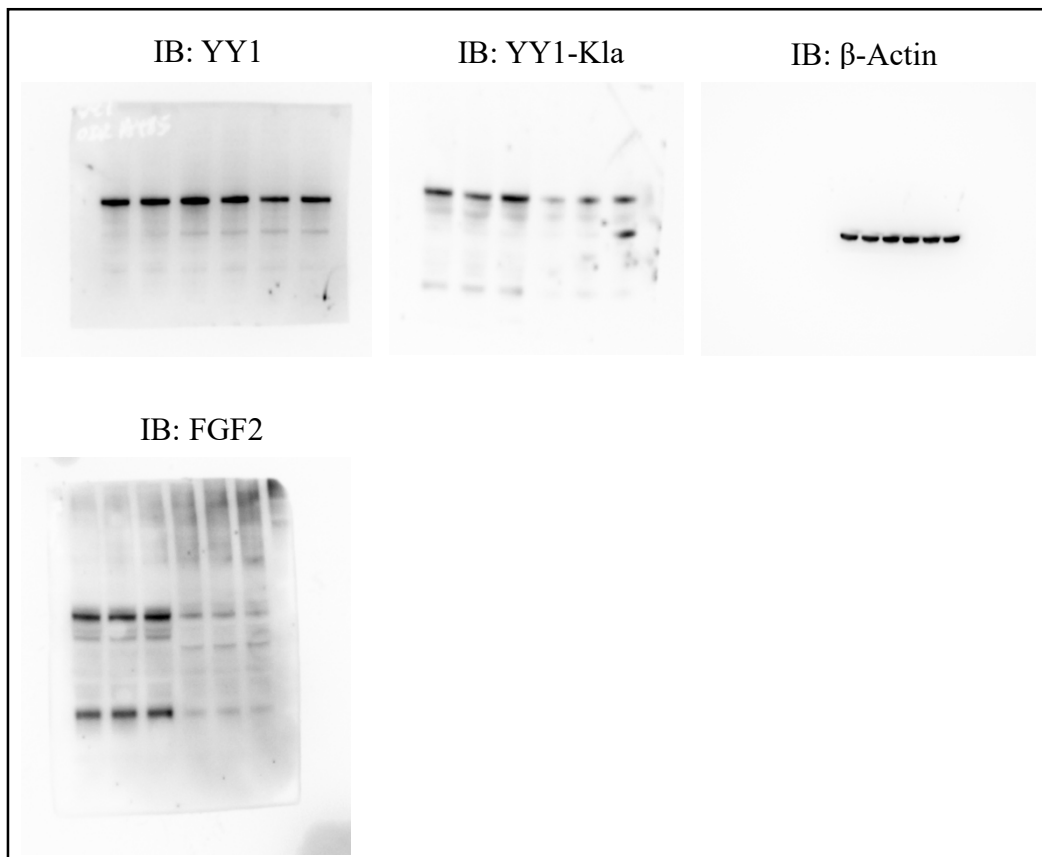

Supplementary Fig. S2f

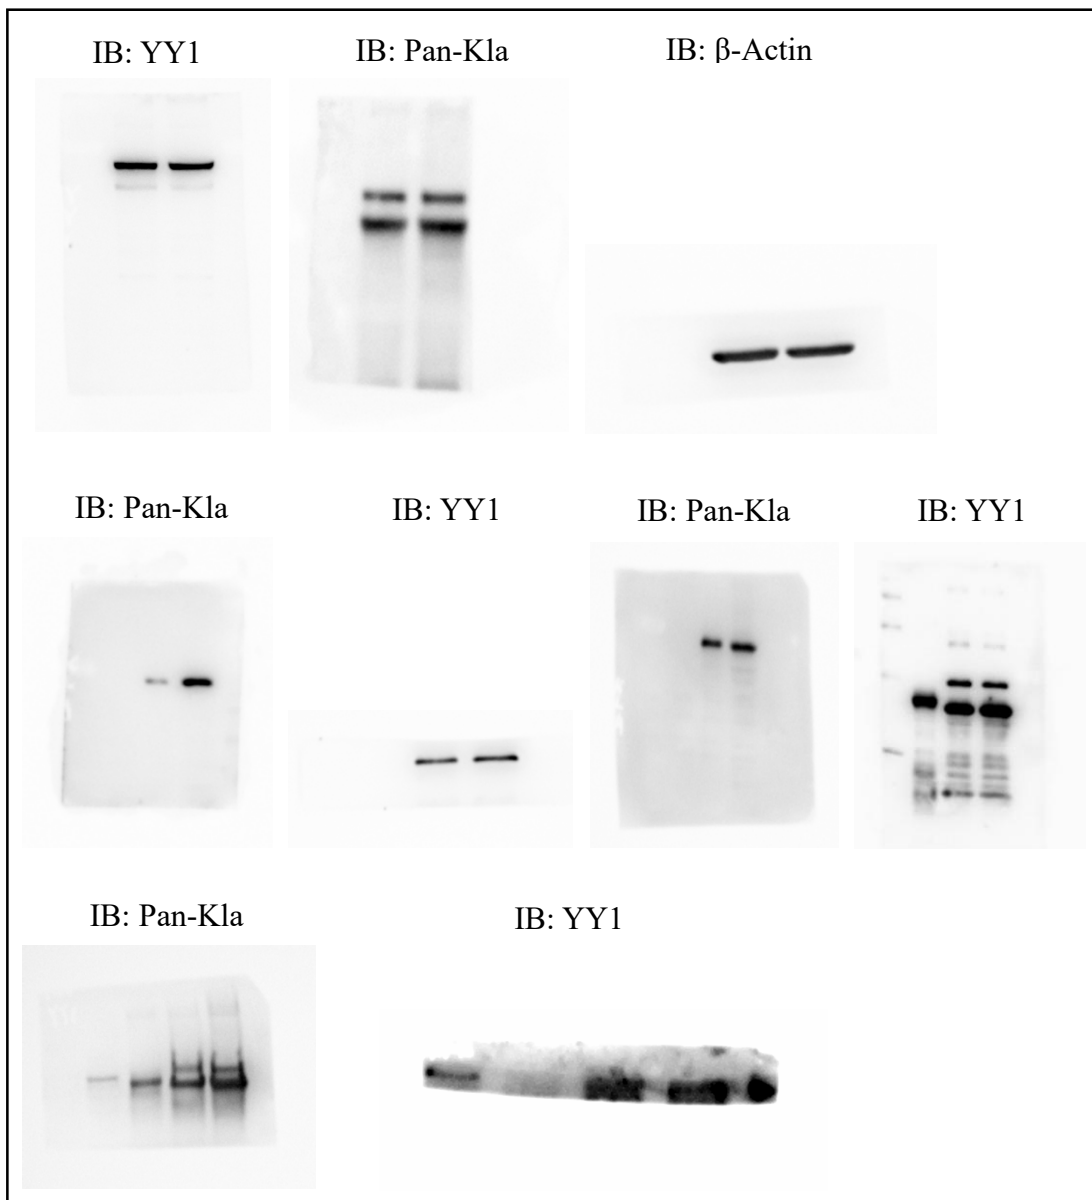

**Supplementary Fig. S2h**

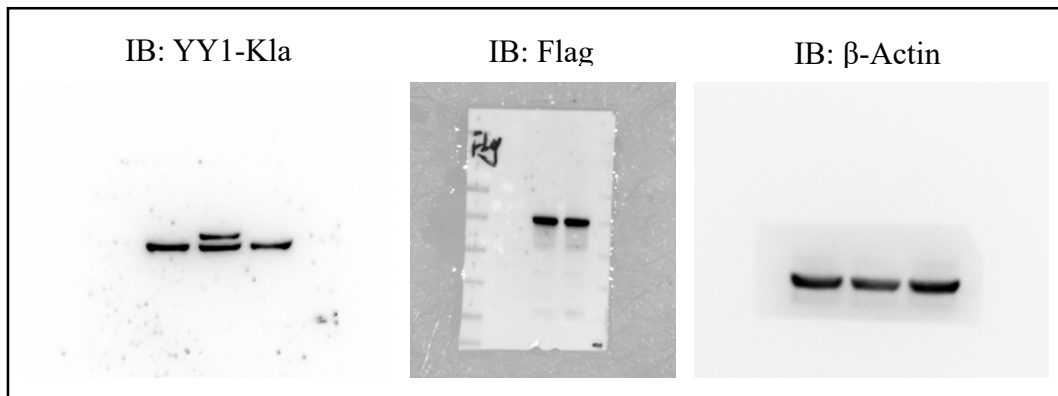

**Supplementary Fig. S4a**

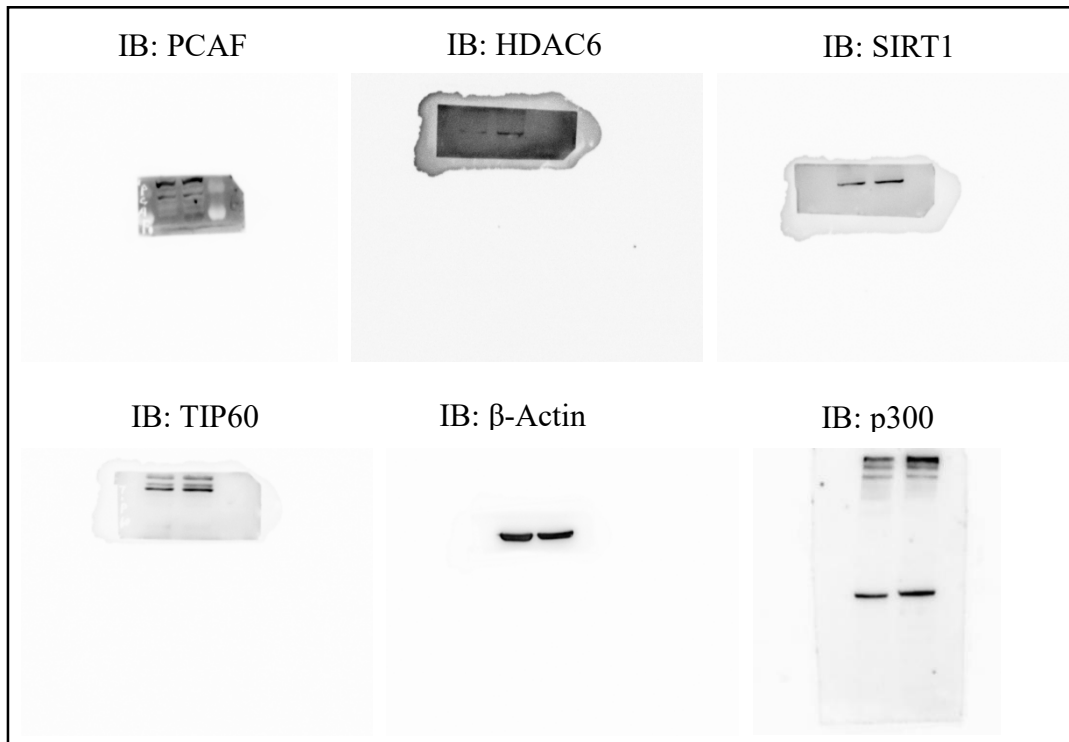

**Supplementary Fig. S4b**

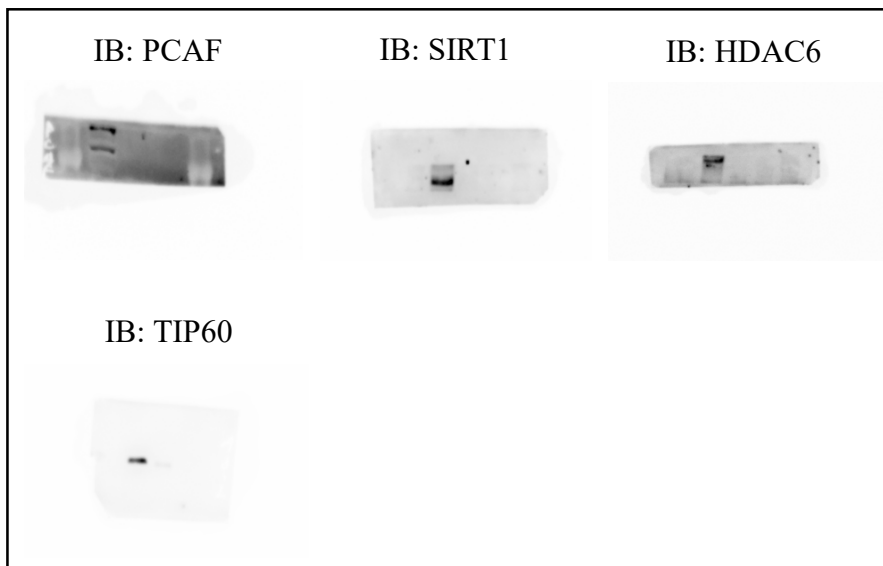

**Supplementary Fig. S4c**

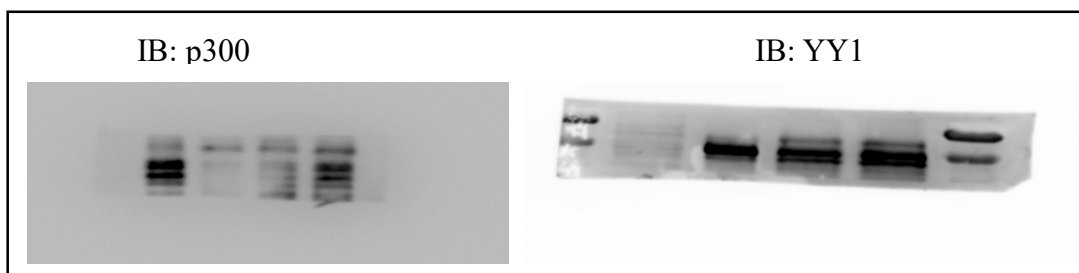

Supplementary Fig. S4d

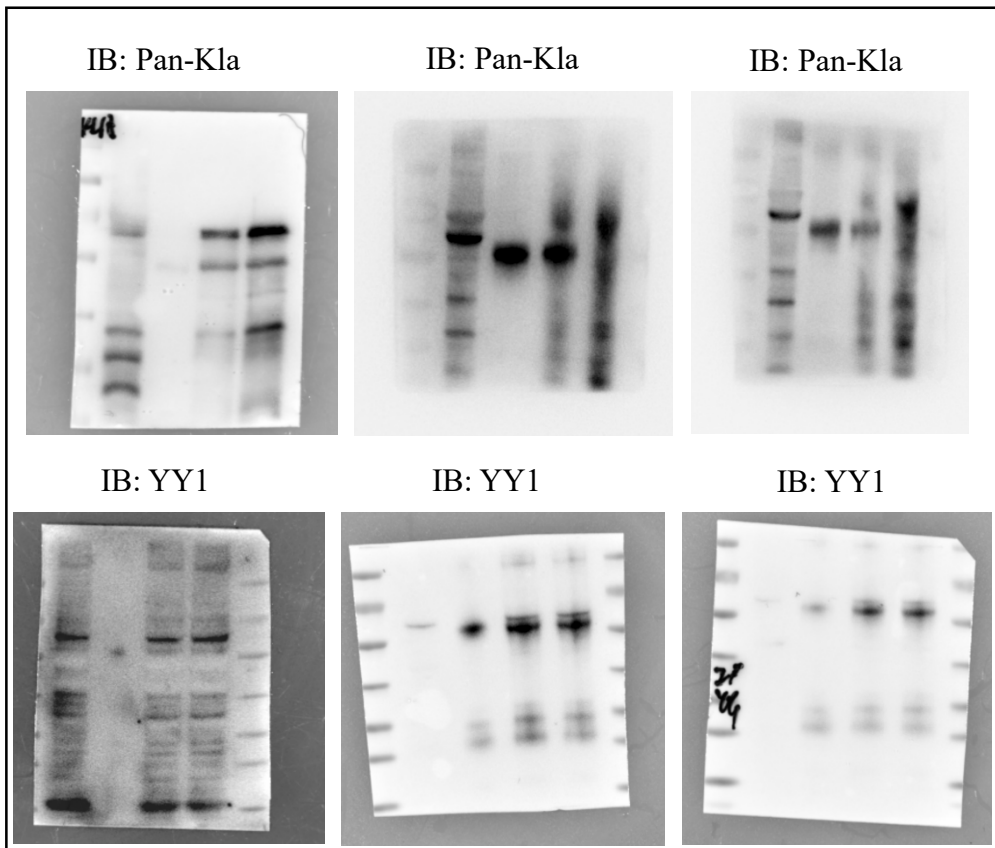

Supplementary Fig. S4e

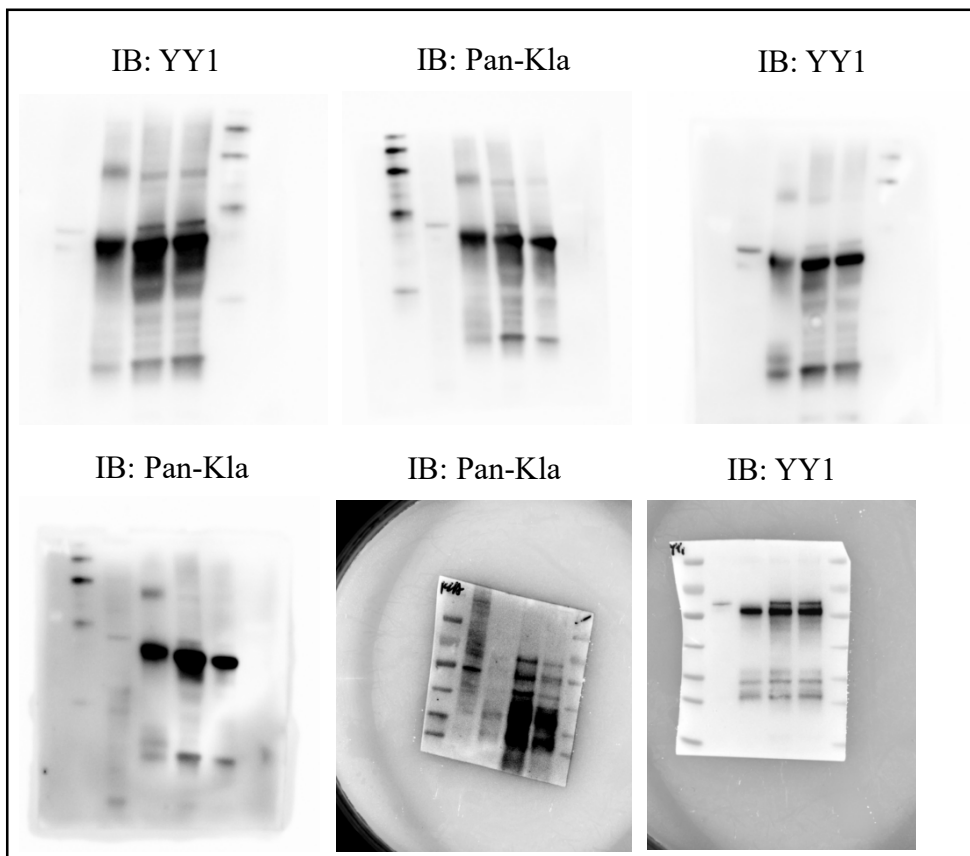

Supplementary Fig. S5a

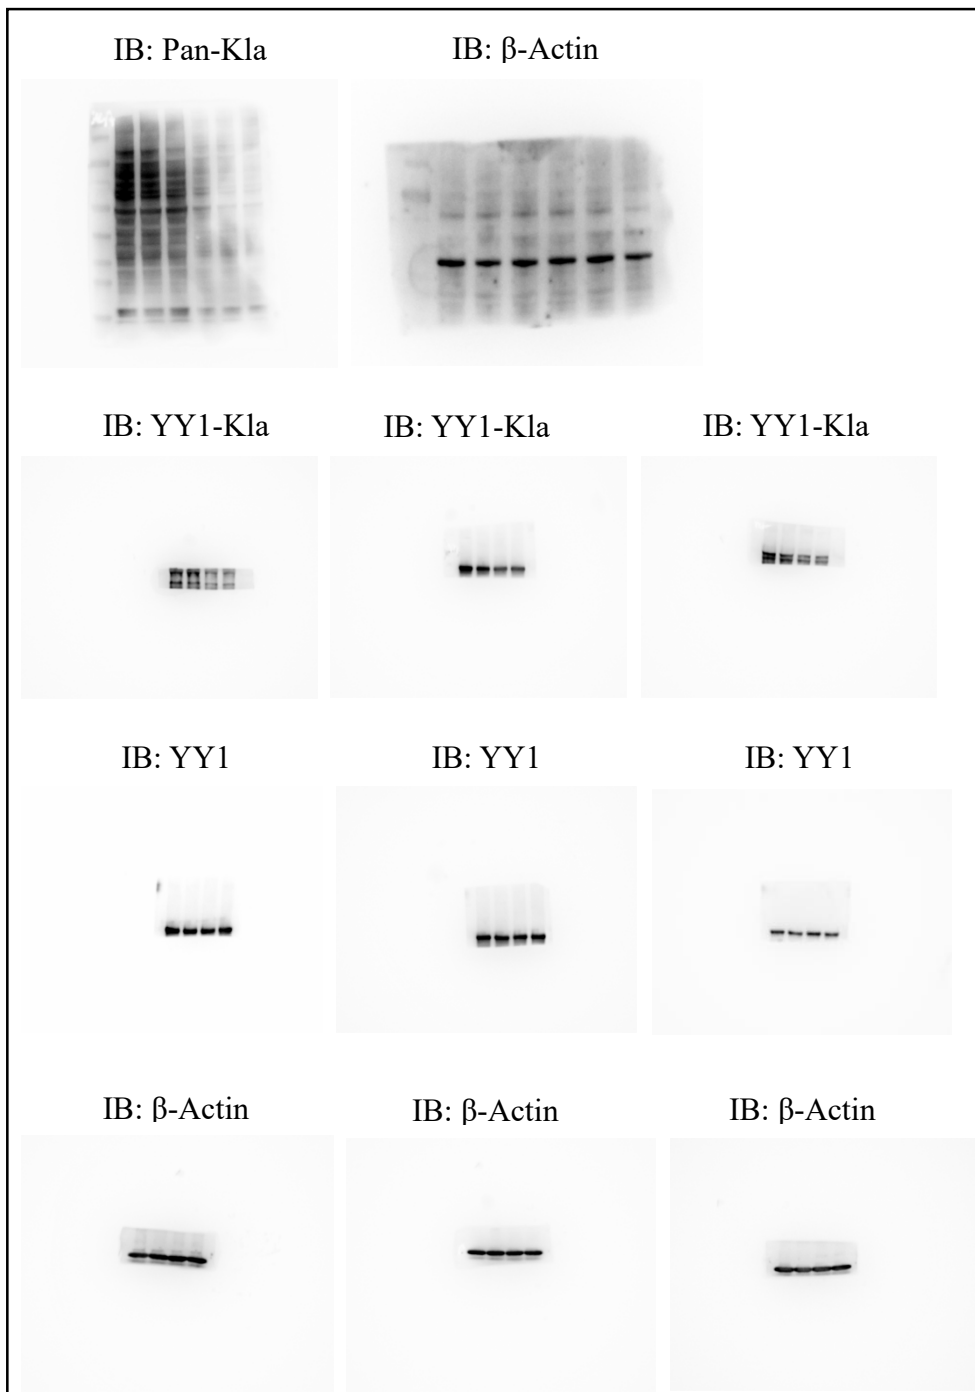

Supplement: 13059_2023_2931_MOESM4_ESM.pdf [file 13059_2023_2931_MOESM4_ESM.pdf]
